# Supplementary material
Source: Research Square preprint supplement (doi:10.21203/rs.3.rs-9348791/v1)
Supplement: Supplementary file 1 [file 5da975b526385eed8b65c30c.docx]

**Supplemental Material**

**Study 2 deviations from preregistration**

The analytic approach largely followed the preregistered plan (<https://osf.io/f4rba>) for Study 2, with several minor modifications. First, the preregistration specified one-way ANOVAs examining the effect of language framing on stereotyping and dehumanization, with follow-up analyses testing moderators. In the final analyses, these factors were instead modeled simultaneously using factorial ANCOVAs including language framing, diagnosis, and familiarity as fixed factors and age (mean-centered) as a covariate. Second, familiarity with mental illness was preregistered as diagnosis-specific personal experience; however, the distribution of responses did not support reliable separation by diagnosis, and familiarity was therefore modeled as a binary indicator reflecting any personal or close-other experience with mental illness. Third, although the preregistration proposed excluding influential outliers based on diagnostic statistics (e.g., Cook’s distance), extreme values were instead winsorized within each subscale (±3 SD) to reduce undue influence while retaining observations. Fourth, several additional data-quality exclusions were implemented that were not specified in the preregistration, including removing participants with implausible completion times (<150 s or >7,200 s) and those reporting implausible or missing demographic information (e.g., age outside 18–75 years or missing education). These adjustments were implemented prior to hypothesis testing and did not alter the conceptual structure of the preregistered hypotheses.

Table 1: Means and Standard Deviations for CAMI Subscales by Diagnosis and Language Framing

| Subscale | Diagnosis | Identity-First  *M (SD)* | Person-First  *M (SD)* |
| --- | --- | --- | --- |
| Authoritarianism | Anorexia  Disability  Psychopathy  Schizophrenia | 21.63 (4.61)  22.04 (4.91)  26.54 (4.71)  22.47 (5.20) | 22.27 (4.92)  21.71 (4.61)  23.85 (5.60)  22.76 (5.30) |
| Benevolence | Anorexia  Disability  Psychopathy  Schizophrenia | 39.12 (5.03)  40.73 (4.72)  35.35 (5.80)  40.23 (5.88) | 39.34 (5.25)  41.50 (4.72)  38.78 (5.97)  39.90 (5.88) |
| Social Restrictiveness | Anorexia  Disability  Psychopathy  Schizophrenia | 16.79 (4.11)  19.27 (4.89)  25.15 (5.42)  20.29 (5.66) | 17.17 (4.58)  18.71 (4.62)  21.95 (5.71)  21.13 (5.25) |
| Community Mental Health Ideology | Anorexia  Disability  Psychopathy  Schizophrenia | 40.90 (5.30)  38.84 (5.98)  31.60 (6.85)  37.26 (6.66) | 40.45 (5.74)  39.09 (5.96)  35.22 (6.59)  36.50 (6.28) |

Values are means with standard deviations in parentheses. *N* = 1,290. Cell sizes ranged from 155 to 167 participants. Higher scores indicate more stigmatizing attitudes for Authoritarianism and Social Restrictiveness and less stigmatizing attitudes for Benevolence and Community Mental Health Ideology.

Table 2: Pairwise Comparisons of CAMI Subscales by Diagnostic Label

| Subscale | Contrast | Difference | 95% CI | *p* |
| --- | --- | --- | --- | --- |
| Authoritarianism | disability-anorexia  psychopathy-anorexia  schizophrenia-anorexia  psychopathy-disability  schizophrenia-disability  schizophrenia-psychopathy | -0.34  2.95  0.36  3.29  0.70  -2.59 | (-1.31, 0.64)  (1.97, 3.93)  (-0.61, 1.3)  (2.31, 4.27)  (-0.26, 1.67)  (-3.56, -1.61) | .806  <.001  .768  <.001  .241  <.001 |
| Benevolence | disability-anorexia  psychopathy-anorexia  schizophrenia-anorexia  psychopathy-disability  schizophrenia-disability  schizophrenia-psychopathy | 2.12  -1.85  1.16  -3.97  -0.96  3.01 | (1.03, 3.20)  (-2.95, -0.76)  (-0.72, 2.24)  (-5.06, -2.87)  (-2.04, 0.12)  (1.92, 4.10) | <.001  <.001  .031  <.001  .102  <.001 |
| Social Restrictiveness | disability-anorexia  psychopathy-anorexia  schizophrenia-anorexia  psychopathy-disability  schizophrenia-disability  schizophrenia-psychopathy | 1.86  6.31  3.50  4.45  1.65  -2.81 | (0.85, 2.87)  (5.30, 7.33)  (2.50, 4.51)  (3.44, 5.47)  (0.64, 2.65)  (-3.82, -1.80) | <.001  <.001  <.001  <.001  <.001  <.001 |
| Community Mental Health Ideology | disability-anorexia  psychopathy-anorexia  schizophrenia-anorexia  psychopathy-disability  schizophrenia-disability  schizophrenia-psychopathy | -1.55  -6.90  -3.49  -5.36  -1.94  3.42 | (-2.76, -0.33)  (-8.13, -5.68)  (-4.69, -2.28)  (-6.58, -4.14)  (-3.15, -0.73)  (2.20, 4.63) | .006  <.001  <.001  <.001  <.001  <.001 |

Positive differences indicate higher scores for the first diagnosis listed in each contrast. Higher scores reflect more stigmatizing attitudes for Authoritarianism and Social Restrictiveness, and less stigmatizing attitudes for Benevolence and Community Mental Health Ideology.

Table 3: Pairwise comparisons of language framing by diagnosis across CAMI subscales

| Subscale | Diagnosis | Contrast | Estimate | 95% CI | *p* |
| --- | --- | --- | --- | --- | --- |
| Authoritarianism | Anorexia  Disability  Psychopathy  Schizophrenia | (identity first – person first)  (identity first – person first)  (identity first – person first)  (identity first – person first) | -0.65  0.33  2.69  -0.36 | (-1.75, 0.45)  (-0.76, 1.42)  (1.60, 3.79)  (-1.45, 0.72) | .248  .554  <.001  .513 |
| Benevolence | Anorexia  Disability  Psychopathy  Schizophrenia | (identity first – person first)  (identity first – person first)  (identity first – person first)  (identity first – person first) | -0.22  -0.78  -3.43  0.67 | (-1.44, 0.99)  (-1.99, 0.43)  (-4.63, 2.22)  (-0.53, 1.87) | .721  .208  <.001  .273 |
| Social Restrictiveness | Anorexia  Disability  Psychopathy  Schizophrenia | (identity first – person first)  (identity first – person first)  (identity first – person first)  (identity first – person first) | -0.39  0.57  3.20  -0.98 | (-1.49, 0.72)  (-0.54, 1.67)  (2.10, 4.29)  (-2.07, 0.11) | .494  .313  <.001  .078 |
| Community Mental Health Ideology | Anorexia  Disability  Psychopathy  Schizophrenia | (identity first – person first)  (identity first – person first)  (identity first – person first)  (identity first – person first) | 0.46  -0.25  -3.62  0.98 | (-0.89, 1.81)  (-1.59, 1.09)  (-4.96, -2.28)  (-0.35, 2.32) | .502  .715  <.001  .147 |

Estimates reflect identity-first minus person-first language. Positive values indicate higher scores under identity-first language. Higher scores reflect more stigmatizing attitudes for Authoritarianism and Social Restrictiveness, and less stigmatizing attitudes for Benevolence and Community Mental Health Ideology.

Table 4: ANOVA Results for CAMI Subscales Predicting Attitudes by Diagnosis, Language Framing, and Familiarity (Psychopathy Excluded)

| Subscale | Effect | *F* | *p* | *ηp²* |
| --- | --- | --- | --- | --- |
| Authoritarianism | Age (covariate)  Diagnosis  Language framing  Familiarity  Diagnosis x Language framing  Diagnosis x Familiarity  Language framing x Familiarity  Diagnosis x Language framing x Familiarity | .09  1.90  .78  65.99  .65  .35  .18  2.05 | .763  .150  .378  <.001  .521  .845  .835  .085 | .000  .004  .000  .120  .001  .001  .000  .009 |
| Benevolence | Age (covariate)  Diagnosis  Language framing  Familiarity  Diagnosis x Language framing  Diagnosis x Familiarity  Language framing x Familiarity  Diagnosis x Language framing x Familiarity | 5.48  13.44  .09  62.64  .46  .78  .10  .66 | .019  <.001  .769  <.001  .631  .541  .904  .620 | .006  .030  .000  .120  .001  .003  .000  .003 |
| Social Restrictiveness | Age (covariate)  Diagnosis  Language framing  Familiarity  Diagnosis x Language framing  Diagnosis x Familiarity  Language framing x Familiarity  Diagnosis x Language framing x Familiarity | 4.73  43.79  1.01  35.90  1.18  .61  .96  .33 | .030  <.001  .316  <.001  .310  .656  .382  .857 | .005  .080  .001  .070  .002  .003  .002  .001 |
| Community Mental Health Ideology | Age (covariate)  Diagnosis  Language framing  Familiarity  Diagnosis x Language framing  Diagnosis x Familiarity  Language framing x Familiarity  Diagnosis x Language framing x Familiarity | 9.31  29.80  1.00  50.11  .26  1.14  .38  .51 | .002  <.001  .317  <.001  .771  .338  .685  .731 | .010  .060  .001  .100  .000  .005  .000  .002 |

Analyses replicate the primary ANOVA models with the psychopathy diagnosis removed to assess the robustness of language framing effects. Age was included as a mean-centered covariate. Degrees of freedom for the *F* tests were (1, 948) for age and language framing, (2, 948) for diagnosis and familiarity, and (4, 948) for higher-order interaction terms.
